# Supplementary material for: A Network-Based Analysis of Disease Complication Associations for Obstetric Disorders in the UK Biobank
Source: MDPI journal article supplement (doi:10.3390/jpm11121382), 2021-12-17
Supplement: s1 [file s1]

## Supplementary Data

*Table S1. Obstetric Disorders under consideration in our analysis.*

| PheCode | Phenotype Name                                                                                 |
|---------|------------------------------------------------------------------------------------------------|
| 634     | Miscarriage/stillbirth                                                                         |
| 634.1   | Missed abortion/Hydatidiform mole                                                              |
| 634.3   | Ectopic pregnancy                                                                              |
| 635     | Hemorrhage during pregnancy; childbirth and postpartum                                         |
| 635.2   | Antepartum hemorrhage, abruptio placentae, and placenta previa                                 |
| 635.3   | Placenta previa and abruptio placenta                                                          |
| 636     | Early or threatened labor or hemorrhage in early pregnancy                                     |
| 636.2   | Early or threatened labor and hemorrhage in early pregnancy                                    |
| 636.3   | Hemorrhage in early pregnancy                                                                  |
| 642     | Hypertension complicating pregnancy, childbirth, and the puerperium                            |
| 642.1   | Preeclampsia and eclampsia                                                                     |
| 643     | Excessive vomiting in pregnancy                                                                |
| 645     | Late pregnancy and failed induction                                                            |
| 646     | Other complications of pregnancy NEC                                                           |
| 647     | Infectious and parasitic complications affecting pregnancy                                     |
| 647.1   | Infections of genitourinary tract during pregnancy                                             |
| 649     | Other conditions or status of the mother complicating pregnancy, childbirth, or the puerperium |
| 650     | Normal delivery                                                                                |
| 651     | Multiple gestation                                                                             |
| 653     | Problems associated with amniotic cavity and membranes                                         |
| 655     | Known or suspected fetal abnormality affecting management of mother                            |
| 661     | Fetal distress and abnormal forces of labor                                                    |
| 663     | Umbilical cord complications during labor and delivery                                         |
| 665     | Obstetrical/birth trauma                                                                       |
| 669     | Complications of labor and delivery NEC                                                        |
| 674     | Other complications of the puerperium NEC                                                      |

*Table S2. Alter-diseases for ObstetricNet(Preeclampsia and eclampsia), sorted by GSSL score*

| PheCode | Phenotype Name                                                      |
|---------|---------------------------------------------------------------------|
| 573.9   | Abnormal serum enzyme levels                                        |
| 175     | Acquired absence of breast                                          |
| 642     | Hypertension complicating pregnancy, childbirth, and the puerperium |
| 598.9   | Other nonspecific findings on examination of urine                  |

|       |                                                                                      |
|-------|--------------------------------------------------------------------------------------|
| 575.9 | Nonspecific abnormal findings on radiological and other examination of biliary tract |
| 733.8 | Malunion and nonunion of fracture                                                    |
| 646   | Other complications of pregnancy NEC                                                 |
| 348.7 | Coma                                                                                 |
| 634   | Miscarriage; stillbirth                                                              |
| 655   | Known or suspected fetal abnormality affecting management of mother                  |
| 293   | Symptoms involving head and neck                                                     |
| 389   | Hearing loss                                                                         |
| 669   | Complications of labor and delivery NEC                                              |
| 368.1 | Amblyopia                                                                            |
| 500   | Lung disease due to external agents                                                  |
| 333.4 | Torsion dystonia                                                                     |
| 334.2 | Anterior horn cell disease                                                           |
| 613.7 | Other signs and symptoms in breast                                                   |
| 458.2 | Iatrogenic hypotension                                                               |
| 279.1 | Immunity deficiency                                                                  |
| 350.3 | Lack of coordination                                                                 |
| 610.4 | Benign neoplasm of breast                                                            |
| 396   | Abnormal heart sounds                                                                |
| 624.1 | Dystrophy of female genital tract                                                    |
| 416   | Cardiomegaly                                                                         |
| 054   | Herpes simplex                                                                       |
| 614.5 | Inflammatory disease of cervix, vagina, and vulva                                    |
| 531.3 | Duodenal ulcer                                                                       |
| 229   | Benign neoplasm of unspecified sites                                                 |
| 614   | Inflammatory diseases of female pelvic organs                                        |
| 480.5 | Bronchopneumonia and lung abscess                                                    |
| 149.1 | Cancer of oropharynx                                                                 |
| 938   | Dermatitis due to solar radiation                                                    |
| 727.1 | Synovitis and tenosynovitis                                                          |
| 626.1 | Irregular menstrual cycle/bleeding                                                   |
| 389.4 | Tinnitus                                                                             |
| 740   | Osteoarthritis                                                                       |
| 550.4 | Umbilical hernia                                                                     |
| 706   | Diseases of sebaceous glands                                                         |
| 496.2 | Chronic bronchitis                                                                   |
| 250.2 | Type 2 diabetes                                                                      |
| 335   | Multiple sclerosis                                                                   |
| 706.2 | Sebaceous cyst                                                                       |
| 427   | Cardiac dysrhythmias                                                                 |
| 427.2 | Atrial fibrillation and flutter                                                      |
| 635.3 | Placenta previa and abruptio placenta                                                |

|       |                                                            |
|-------|------------------------------------------------------------|
| 530.1 | Esophagitis, GERD, and related diseases                    |
| 635   | Hemorrhage during pregnancy; childbirth and postpartum     |
| 242   | Exophthalmos                                               |
| 244.4 | Hypothyroidism NOS                                         |
| 696.4 | Psoriasis                                                  |
| 244   | Hypothyroidism                                             |
| 250.7 | Diabetic retinopathy                                       |
| 411.3 | Angina pectoris                                            |
| 411   | Ischemic Heart Disease                                     |
| 715   | Other inflammatory spondylopathies                         |
| 530   | Diseases of esophagus                                      |
| 411.4 | Coronary atherosclerosis                                   |
| 728.7 | Fasciitis                                                  |
| 512.7 | Shortness of breath                                        |
| 562   | Diverticulosis and diverticulitis                          |
| 562.1 | Diverticulosis                                             |
| 728   | Disorders of muscle, ligament, and fascia                  |
| 241   | Nontoxic nodular goiter                                    |
| 512   | Other symptoms of respiratory system                       |
| 217   | Vascular hamartomas and non-neoplastic navi                |
| 217.1 | Nevus, non-neoplastic                                      |
| 225.1 | Benign neoplasm of brain, cranial nerves, meninges         |
| 225   | Benign neoplasm of brain and other parts of nervous system |

*Table S3. Performance results (up to 3 significant figures) for the graph-based scoring algorithm applied to egocentric DDNs for all 26 obstetric disorders. Rows marked in bold correspond to phenotypes that yielded significant  $p$ -values compared to a Bonferroni-corrected alpha of  $0.05/26 = 1.92 \times 10^{-3}$ .*

| PheCode      | Phenotype Name                                                 | Number of Neighboring Nodes | AUC          | Rho          | P-value                                 |
|--------------|----------------------------------------------------------------|-----------------------------|--------------|--------------|-----------------------------------------|
| 634          | Miscarriage/stillbirth                                         | 68                          | 0.729        | 0.343        | $4.14 \times 10^{-3}$                   |
| <b>634.1</b> | <b>Missed abortion/Hydatidiform mole</b>                       | <b>57</b>                   | <b>0.919</b> | <b>0.529</b> | <b><math>2.30 \times 10^{-5}</math></b> |
| 634.3        | Ectopic pregnancy                                              | 49                          | 0.550        | -0.0524      | 0.720                                   |
| 635          | Hemorrhage during pregnancy; childbirth and postpartum         | 72                          | 1.00         | 0.203        | $8.77 \times 10^{-2}$                   |
| 635.2        | Antepartum hemorrhage, abruptio placentae, and placenta previa | 93                          | 0.714        | 0.196        | $5.99 \times 10^{-2}$                   |

|       |                                                                                                |     |       |         |                  |
|-------|------------------------------------------------------------------------------------------------|-----|-------|---------|------------------|
| 635.3 | <b>Placenta previa and abruptio placenta</b>                                                   | 68  | 0.822 | 0.484   | $2.94 * 10^{-5}$ |
| 636   | Early or threatened labor; hemorrhage in early pregnancy                                       | 71  | 0.702 | 0.270   | $2.27 * 10^{-2}$ |
| 636.2 | Early or threatened labor/hemorrhage in early pregnancy                                        | 67  | 0.825 | 0.322   | $7.95 * 10^{-3}$ |
| 636.3 | Hemorrhage in early pregnancy                                                                  | 58  | 0.644 | 0.181   | 0.175            |
| 642   | Hypertension complicating pregnancy, childbirth, and the puerperium                            | 65  | 0.599 | 0.106   | 0.402            |
| 642.1 | Preeclampsia and eclampsia                                                                     | 69  | 0.823 | 0.315   | $8.36 * 10^{-3}$ |
| 643   | Excessive vomiting in pregnancy                                                                | 42  | 0.812 | 0.278   | $7.42 * 10^{-2}$ |
| 645   | Late pregnancy and failed induction                                                            | 66  | 0.862 | 0.153   | 0.220            |
| 646   | Other complications of pregnancy NEC                                                           | 84  | 0.660 | 0.232   | $3.39 * 10^{-2}$ |
| 647   | Infectious and parasitic complications affecting pregnancy                                     | 75  | 0.546 | -0.0395 | 0.736            |
| 647.1 | Infections of genitourinary tract during pregnancy                                             | 77  | 0.686 | 0.159   | 0.168            |
| 649   | Other conditions or status of the mother complicating pregnancy, childbirth, or the puerperium | 133 | 0.584 | 0.0968  | 0.268            |
| 650   | Normal delivery                                                                                | 86  | 0.618 | 0.0753  | 0.491            |
| 651   | Multiple gestation                                                                             | 57  | 0.852 | 0.272   | $4.05 * 10^{-2}$ |
| 653   | Problems associated with amniotic cavity and membranes                                         | 86  | 0.847 | 0.281   | $8.71 * 10^{-3}$ |
| 655   | <b>Known or suspected fetal abnormality affecting management of mother</b>                     | 86  | 0.854 | 0.376   | $3.65 * 10^{-4}$ |
| 661   | Fetal distress and abnormal forces of labor                                                    | 83  | 0.523 | 0.0286  | 0.797            |
| 663   | Umbilical cord complications during labor and delivery                                         | 76  | 0.753 | 0.171   | 0.140            |
| 665   | Obstetrical/birth trauma                                                                       | 89  | 0.750 | 0.248   | $1.93 * 10^{-2}$ |
| 669   | <b>Complications of labor and delivery NEC</b>                                                 | 63  | 0.882 | 0.440   | $3.03 * 10^{-4}$ |

|     |                                           |    |       |        |                  |
|-----|-------------------------------------------|----|-------|--------|------------------|
| 674 | Other complications of the puerperium NEC | 95 | 0.788 | -0.201 | $5.12 * 10^{-2}$ |
|-----|-------------------------------------------|----|-------|--------|------------------|
